# Supplementary material for: TTF-1, CDX-2, and PAX-8 Immunoexpression in a Large Serie of Extrapulmonary Small Cell Neuroendocrine Carcinomas: A Study of 138 Cases
Source: Research Square preprint supplement (doi:10.21203/rs.3.rs-6821428/v1), 2025-07-18
Supplement: Supplementary file 1 [file e6a0a46da2a25d112d3adac5.xlsx]

## Sheet: data
ID	Sex	Location	Tumor_type	CDX2	TTF1	PAX8
23	female	Breast	breast	0	0	0
83	female	Breast	breast	0	0	0
100	female	Breast	breast	0	1	1
116	female	Breast	breast	0	1	0
158	female	Breast	breast	0	1	1
203	female	Breast	breast	NA	NA	NA
48	male	Genitourinary	genitourinary, NS	NA	NA	NA
53	male	Genitourinary	genitourinary, NS	NA	NA	NA
55	male	Genitourinary	genitourinary, NS	NA	NA	NA
58	male	Genitourinary	genitourinary, NS	NA	NA	NA
61	male	Genitourinary	genitourinary, NS	0	0	1
25	male	Genitourinary	kidney	0	0	1
142	female	Genitourinary	kidney	NA	NA	NA
165	female	Genitourinary	kidney	0	1	1
146	male	Genitourinary	kidney	0	0	0
6	male	Genitourinary	prostate	NA	NA	NA
10	male	Genitourinary	prostate	0	1	0
14	male	Genitourinary	prostate	0	0	0
34	male	Genitourinary	prostate	0	1	1
69	male	Genitourinary	prostate	0	0	0
70	male	Genitourinary	prostate	1	1	1
78	male	Genitourinary	prostate	0	0	1
81	male	Genitourinary	prostate	0	1	0
95	male	Genitourinary	prostate	0	1	1
106	male	Genitourinary	prostate	0	1	1
111	male	Genitourinary	prostate	1	0	0
115	male	Genitourinary	prostate	NA	NA	NA
130	male	Genitourinary	prostate	0	1	0
138	male	Genitourinary	prostate	0	0	0
160	male	Genitourinary	prostate	NA	NA	NA
166	male	Genitourinary	prostate	0	1	1
172	male	Genitourinary	prostate	0	1	1
173	male	Genitourinary	prostate	0	0	0
174	male	Genitourinary	prostate	NA	NA	NA
177	male	Genitourinary	prostate	NA	NA	NA
183	male	Genitourinary	prostate	0	1	1
184	male	Genitourinary	prostate	0	0	0
187	male	Genitourinary	prostate	NA	NA	0
198	male	Genitourinary	prostate	0	1	1
7	male	Genitourinary	urinary bladder	0	0	0
11	male	Genitourinary	urinary bladder	0	0	1
12	male	Genitourinary	urinary bladder	0	0	1
1	female	Genitourinary	urinary bladder	0	1	0
8	female	Genitourinary	urinary bladder	0	1	1
20	female	Genitourinary	urinary bladder	1	0	1
37	female	Genitourinary	urinary bladder	0	1	1
50	female	Genitourinary	urinary bladder	0	0	0
63	female	Genitourinary	urinary bladder	0	0	0
64	female	Genitourinary	urinary bladder	0	0	1
84	female	Genitourinary	urinary bladder	0	0	0
89	female	Genitourinary	urinary bladder	0	0	0
120	female	Genitourinary	urinary bladder	0	0	0
135	female	Genitourinary	urinary bladder	0	0	1
141	female	Genitourinary	urinary bladder	0	0	0
51	male	Genitourinary	urinary bladder	0	1	1
52	male	Genitourinary	urinary bladder	0	0	1
54	male	Genitourinary	urinary bladder	NA	NA	NA
56	male	Genitourinary	urinary bladder	0	0	0
57	male	Genitourinary	urinary bladder	0	0	1
59	male	Genitourinary	urinary bladder	1	0	0
60	male	Genitourinary	urinary bladder	0	0	1
62	male	Genitourinary	urinary bladder	0	0	0
65	male	Genitourinary	urinary bladder	NA	NA	NA
168	female	Genitourinary	urinary bladder	0	0	0
176	female	Genitourinary	urinary bladder	0	1	1
194	female	Genitourinary	urinary bladder	0	0	1
73	male	Genitourinary	urinary bladder	0	0	0
76	male	Genitourinary	urinary bladder	0	0	0
80	male	Genitourinary	urinary bladder	1	0	0
86	male	Genitourinary	urinary bladder	1	1	1
90	male	Genitourinary	urinary bladder	0	0	0
91	male	Genitourinary	urinary bladder	0	1	0
92	male	Genitourinary	urinary bladder	0	0	0
96	male	Genitourinary	urinary bladder	0	0	0
110	male	Genitourinary	urinary bladder	NA	NA	NA
114	male	Genitourinary	urinary bladder	0	1	0
119	male	Genitourinary	urinary bladder	0	1	1
131	male	Genitourinary	urinary bladder	0	0	1
139	male	Genitourinary	urinary bladder	0	0	1
156	male	Genitourinary	urinary bladder	NA	NA	NA
161	male	Genitourinary	urinary bladder	0	0	1
179	male	Genitourinary	urinary bladder	0	0	0
180	male	Genitourinary	urinary bladder	0	0	1
181	male	Genitourinary	urinary bladder	1	1	1
182	male	Genitourinary	urinary bladder	0	0	1
186	male	Genitourinary	urinary bladder	0	0	0
191	male	Genitourinary	urinary bladder	0	0	0
192	male	Genitourinary	urinary bladder	0	1	0
196	male	Genitourinary	urinary bladder	0	0	0
197	male	Genitourinary	urinary bladder	1	1	1
199	male	Genitourinary	urinary bladder	0	0	0
200	male	Genitourinary	urinary bladder	0	1	0
202	male	Genitourinary	urinary bladder	NA	NA	NA
36	male	GI tract	anal canal	0	1	0
162	female	GI tract	anal canal	1	0	1
29	male	GI tract	colon	1	0	0
38	male	GI tract	colon	0	0	0
144	female	GI tract	colon	0	0	0
204	female	GI tract	colon	NA	NA	NA
103	male	GI tract	colon	0	0	0
137	male	GI tract	colon	0	1	0
163	male	GI tract	colon	0	0	0
72	male	GI tract	duodenum	NA	NA	NA
85	male	GI tract	GE junction	NA	NA	NA
99	male	GI tract	GE junction	1	0	0
35	male	GI tract	GI tract, NS	NA	NA	NA
32	female	GI tract	GI tract, NS	0	0	0
154	female	GI tract	GI tract, NS	NA	NA	NA
26	male	GI tract	oesophagus	0	0	0
67	female	GI tract	oesophagus	0	0	0
124	female	GI tract	oesophagus	NA	NA	NA
16	male	GI tract	rectum	0	0	0
71	female	GI tract	rectum	0	0	0
188	male	GI tract	rectum	1	0	1
189	male	GI tract	rectum	NA	NA	NA
190	male	GI tract	rectum	NA	NA	NA
31	female	GI tract	small intestine	0	1	1
87	male	GI tract	small intestine	0	1	0
13	male	GI tract	stomach	0	0	0
28	female	GI tract	stomach	NA	NA	NA
74	male	GI tract	stomach	NA	NA	NA
167	female	GI tract	stomach	NA	NA	NA
136	male	GI tract	stomach	1	0	1
171	male	GI tract	stomach	1	0	1
75	female	Gynaecological	ovary	0	0	1
140	female	Gynaecological	ovary	NA	NA	NA
9	female	Gynaecological	uterine cervix	NA	NA	NA
19	female	Gynaecological	uterine cervix	NA	NA	NA
24	female	Gynaecological	uterine cervix	0	0	0
30	female	Gynaecological	uterine cervix	0	0	1
88	female	Gynaecological	uterine cervix	0	0	1
101	female	Gynaecological	uterine cervix	0	0	1
105	female	Gynaecological	uterine cervix	0	0	0
127	female	Gynaecological	uterine cervix	0	0	0
164	female	Gynaecological	uterine cervix	0	0	0
178	female	Gynaecological	uterine cervix	0	0	1
185	female	Gynaecological	uterine cervix	0	0	0
193	female	Gynaecological	uterine cervix	0	0	0
195	female	Gynaecological	uterine cervix	0	0	1
68	female	Gynaecological	uterine corpus	0	0	1
102	female	Gynaecological	uterine corpus	0	0	1
159	female	Gynaecological	uterine corpus	NA	NA	NA
98	female	Gynaecological	vagina	1	0	1
94	male	Haed and neck	nasopharynx	0	0	0
97	male	Haed and neck	nasopharynx	0	0	1
17	male	Haed and neck	salivary gland	0	0	1
33	female	Haed and neck	salivary gland	0	0	1
175	male	Haed and neck	salivary gland	0	0	1
77	female	Haed and neck	thyreoid gland	0	0	0
93	male	Haed and neck	tongue	0	0	1
148	male	Haed and neck	tonsille	0	1	0
153	male	Hepatobiliary	ampula of Vater	NA	NA	NA
66	female	Hepatobiliary	gallbladder	NA	NA	NA
151	female	Hepatobiliary	hepatobiliary	0	0	1
152	female	Hepatobiliary	hepatobiliary	NA	NA	NA
82	male	Hepatobiliary	liver	0	0	1
18	female	Hepatobiliary	liver	0	0	0
79	male	Pancreas	pancreas	1	0	0
113	male	Pancreas	pancreas	NA	NA	NA
121	male	Pancreas	pancreas	0	0	0
128	male	Pancreas	pancreas	NA	NA	NA
27	female	Pancreas	pancreas	NA	NA	NA
169	male	Pancreas	pancreas	0	1	0
104	female	Pancreas	pancreas	NA	NA	NA
109	female	Pancreas	pancreas	NA	NA	NA
123	female	Pancreas	pancreas	1	0	0
125	female	Pancreas	pancreas	NA	NA	NA
170	female	Pancreas	pancreas	0	1	1
201	female	Pancreas	pancreas	NA	NA	NA
147	male	Skin	skin	0	0	0
21	male	Unknown primary	unknown primary	0	0	0
107	male	Unknown primary	unknown primary	0	0	0
112	male	Unknown primary	unknown primary	1	NA	NA
117	male	Unknown primary	unknown primary	NA	NA	NA
118	male	Unknown primary	unknown primary	0	0	1
122	male	Unknown primary	unknown primary	NA	NA	NA
132	male	Unknown primary	unknown primary	NA	NA	NA
145	male	Unknown primary	unknown primary	0	0	1
157	male	Unknown primary	unknown primary	1	0	0
22	female	Unknown primary	unknown primary	0	0	1
47	female	Unknown primary	unknown primary	0	0	0
126	female	Unknown primary	unknown primary	NA	NA	NA
150	female	Unknown primary	unknown primary	0	0	1
